# Supplementary material
Source: PubMed Central journal article supplement (PMC4956507)
Supplement: NIHMS792504-supplement-Supplemental_Material.pdf [file NIHMS792504-supplement-Supplemental_Material.pdf]

**SUPPLEMENTAL MATERIAL**

**Table S1. Baseline (1967-73) Characteristics of 2003 Survey Respondents Compared with Non-Respondents - 2003 Chicago Heart Association Detection Project in Industry (CHA) Health Survey**

| Characteristics <sup>†</sup>         | All Surviving CHA participants ages 65 <sup>+</sup><br>in 2003 <sup>‡</sup> |                 |                                                                   | P-Value <sup>§</sup> |
|--------------------------------------|-----------------------------------------------------------------------------|-----------------|-------------------------------------------------------------------|----------------------|
|                                      | Questionnaires were mailed                                                  |                 | Questionnaires were not mailed<br>(Prior Surveys non-respondents) |                      |
|                                      | Respondents                                                                 | Non-respondents |                                                                   |                      |
| N                                    | 6716                                                                        | 3982            | 3991                                                              |                      |
| Age (years)                          | 43.2                                                                        | 40.7***         | 45.4***                                                           | <.001                |
| Female (%)                           | 40.4                                                                        | 42.9*           | 51.6***                                                           | <.001                |
| Black (%)                            | 4.3                                                                         | 9.1***          | 11.1***                                                           | <.001                |
| Education (years)                    | 13.5                                                                        | 13.1***         | 12.0***                                                           | <.001                |
| Cigarette smoking (%)                |                                                                             |                 |                                                                   | <.001                |
| Never-smoker                         | 39.4                                                                        | 38.5            | 37.7                                                              |                      |
| Former smoker                        | 30.4                                                                        | 26.0            | 21.5                                                              |                      |
| Current smoker                       | 30.2                                                                        | 35.5            | 40.8                                                              |                      |
| Current smoker (%)                   | 30.2                                                                        | 35.5***         | 40.8***                                                           | <.001                |
| Body mass index (kg/m <sup>2</sup> ) | 25.7                                                                        | 25.7            | 26.0***                                                           | <.001                |
| Obesity (%)                          | 10.9                                                                        | 11.8            | 14.6***                                                           | <.001                |

|                                           |       |           |           |       |
|-------------------------------------------|-------|-----------|-----------|-------|
| Blood pressure (BP;<br>mmHg) <sup>§</sup> |       |           |           |       |
| Systolic BP                               | 133.5 | 133.0     | 137.0**** | <.001 |
| Diastolic BP                              | 79.5  | 79.2      | 81.2      | <.001 |
| Hypertension (%) <sup>  </sup>            | 45.0  | 43.4      | 51.5****  | <.001 |
| Cholesterol (mg/dL)                       | 206.8 | 203.5**** | 209.9**** | <.001 |
| Hypercholesterolemia (%) <sup>#</sup>     | 17.9  | 16.3*     | 20.5**    | <.001 |
| Diabetes (%)                              | 1.7   | 1.5       | 1.9       | .485  |
| Low Risk (%)                              | 5.9   | 6.7       | 3.5****   | <.001 |

†Numbers are mean unless otherwise indicated.

‡All surviving CHA participants ages 65+ in 2003

§P-value for comparison between group based on  $\chi^2$  or F-test.

||Includes persons using antihypertensive medication.

#Includes persons using lipid-lowering medication.

\*P-value <.005, \*\*<.01, \*\*\*<.001 for pairwise comparisons with survey respondents (reference group) based on Wald  $\chi^2$  or F tests

**Figure S1. Flow Chart Describing 2003 CHA Health Survey Follow-up Recruitment**

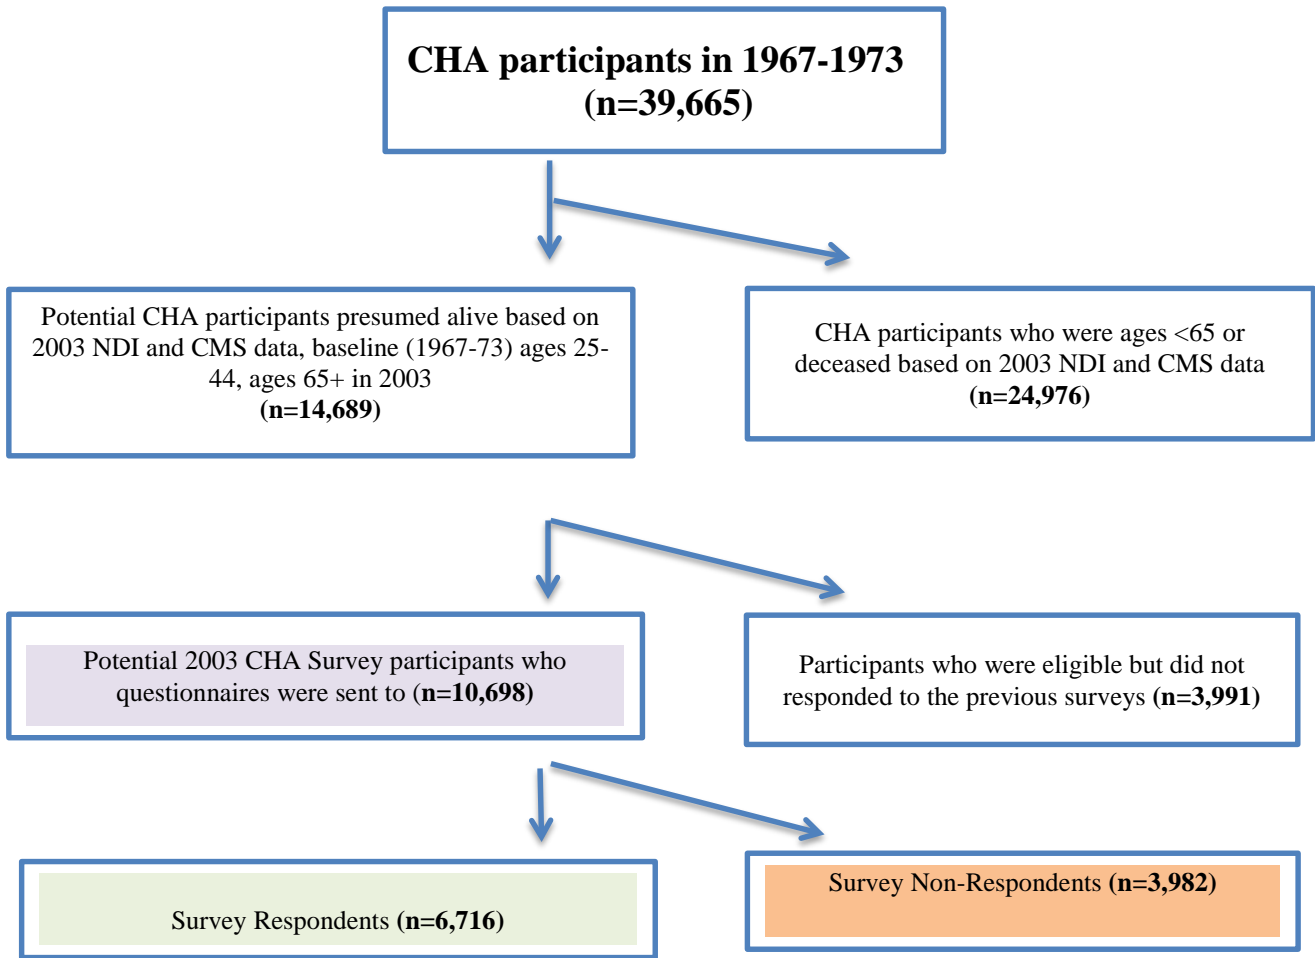

CHA indicates Chicago Heart Association Detection Project in Industry, NDI, National Death Index; CMS, Centers for Medicare and Medicaid Services
